# Supplementary material for: The Notch signaling pathway promotes basophil responses during helminth-induced type 2 inflammation
Source: PubMed Central journal article supplement — J Exp Med. 2019 Apr 11;216(6):1268–79. doi: 10.1084/jem.20180131 (PMC6547860; doi:10.1084/jem.20180131), 2019-04-11
Supplement: JEM_20180131_sm.pdf [file JEM_20180131_sm.pdf]

Supplemental material

Webb et al., <https://doi.org/10.1084/jem.20180131>

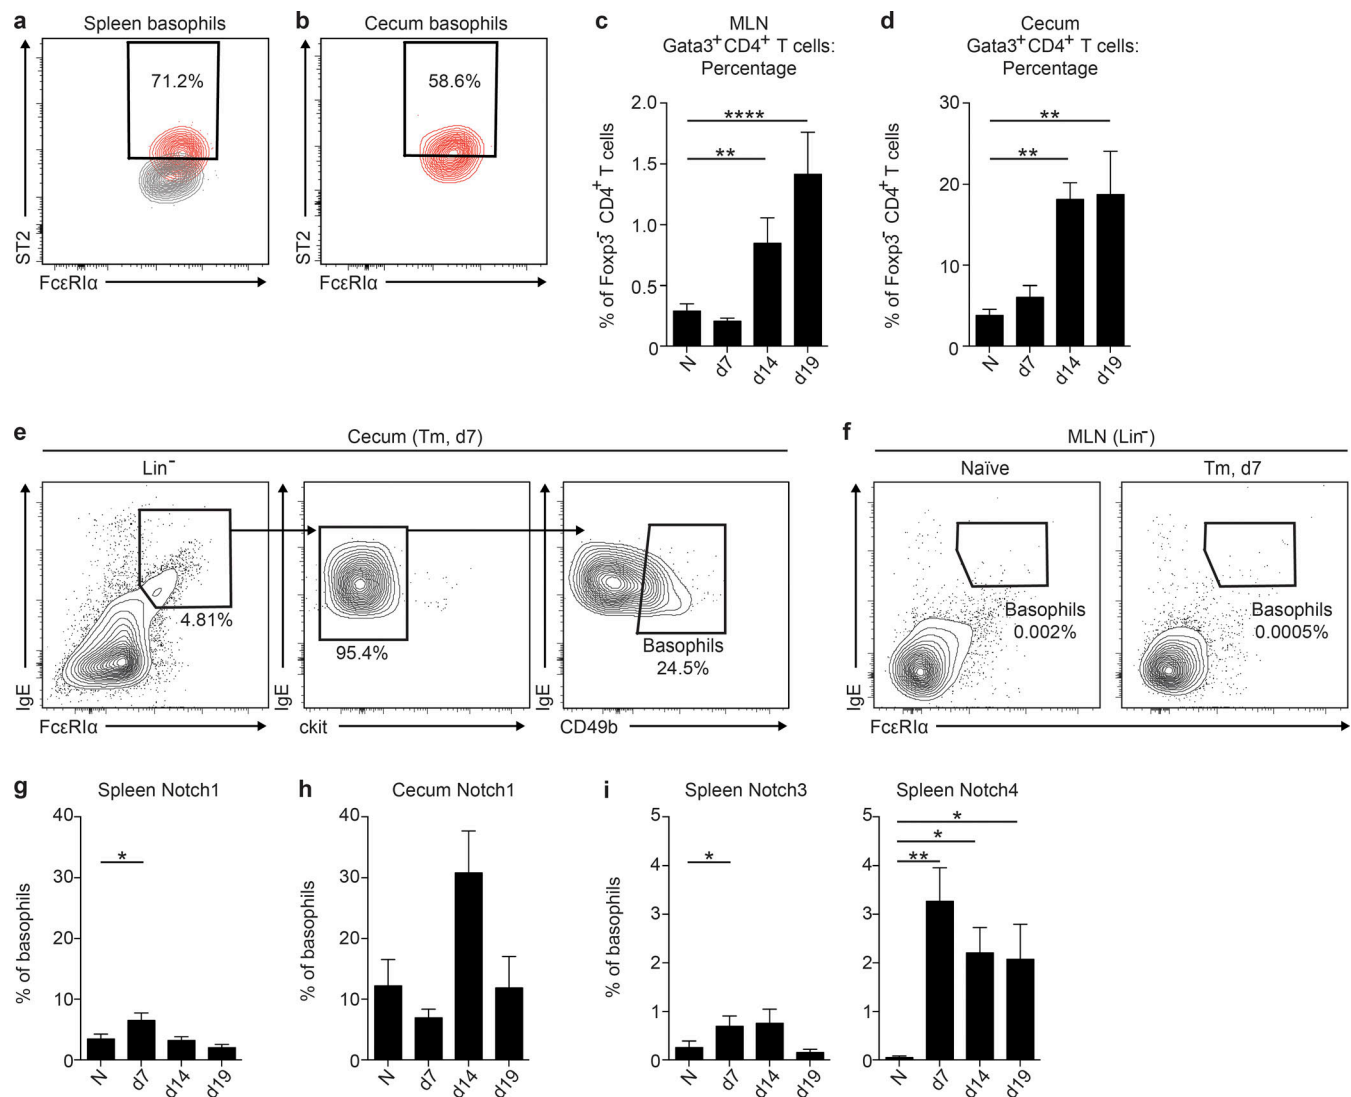

Figure S1. **Basophil phenotype.** (a and b) Representative plots of spleen (a) and cecum (b) basophil (gated as in Fig. 1 a) ST2 expression (gray, isotype; red, fully stained). (c and d) MLN (c) and cecum (d) percentage of Gata3<sup>+</sup> Th2 cells of TCRβ<sup>+</sup>CD4<sup>+</sup>Foxp3<sup>-</sup> cells in naive (N) and *T. muris*-infected (Tm) C57BL/6 mice on day (d) 7, 14, and 19 p.i. (e and f) Representative plots of cecum basophils (e; CD45<sup>+</sup>Lineage(Lin)<sup>-</sup>FcεRIα<sup>+</sup>IgE<sup>+</sup>CD49b<sup>+</sup>ckit<sup>-</sup>) and percentage of basophils of Lin<sup>-</sup> cells (f; percentage is FcεRIα<sup>+</sup>IgE<sup>+</sup>CD49b<sup>+</sup>ckit<sup>-</sup> of Lin<sup>-</sup>) in the MLN in day 7 *T. muris*-infected C57BL/6 mice. (g-i) Percentage of spleen (g) and cecum (h) basophils that expressed Notch1 and spleen basophils (i) that expressed Notch3 or 4 in N- and *T. muris*-infected C57BL/6 mice on day 7, 14, and 19 p.i. Mean ± SEM; \*, P < 0.05; \*\*, P < 0.01; \*\*\*\*, P < 0.0001; analyzed using (c, d, g, and i) a linear fixed-effect model with pairwise comparison; (a and b) representative of three experiments; (c and d) three experiments pooled (N, n = 18; Tm, n = 7-13/time point); (e and f) representative of three experiments; (g-i) three experiments pooled (N, n = 18; Tm, n = 7-13/time point).

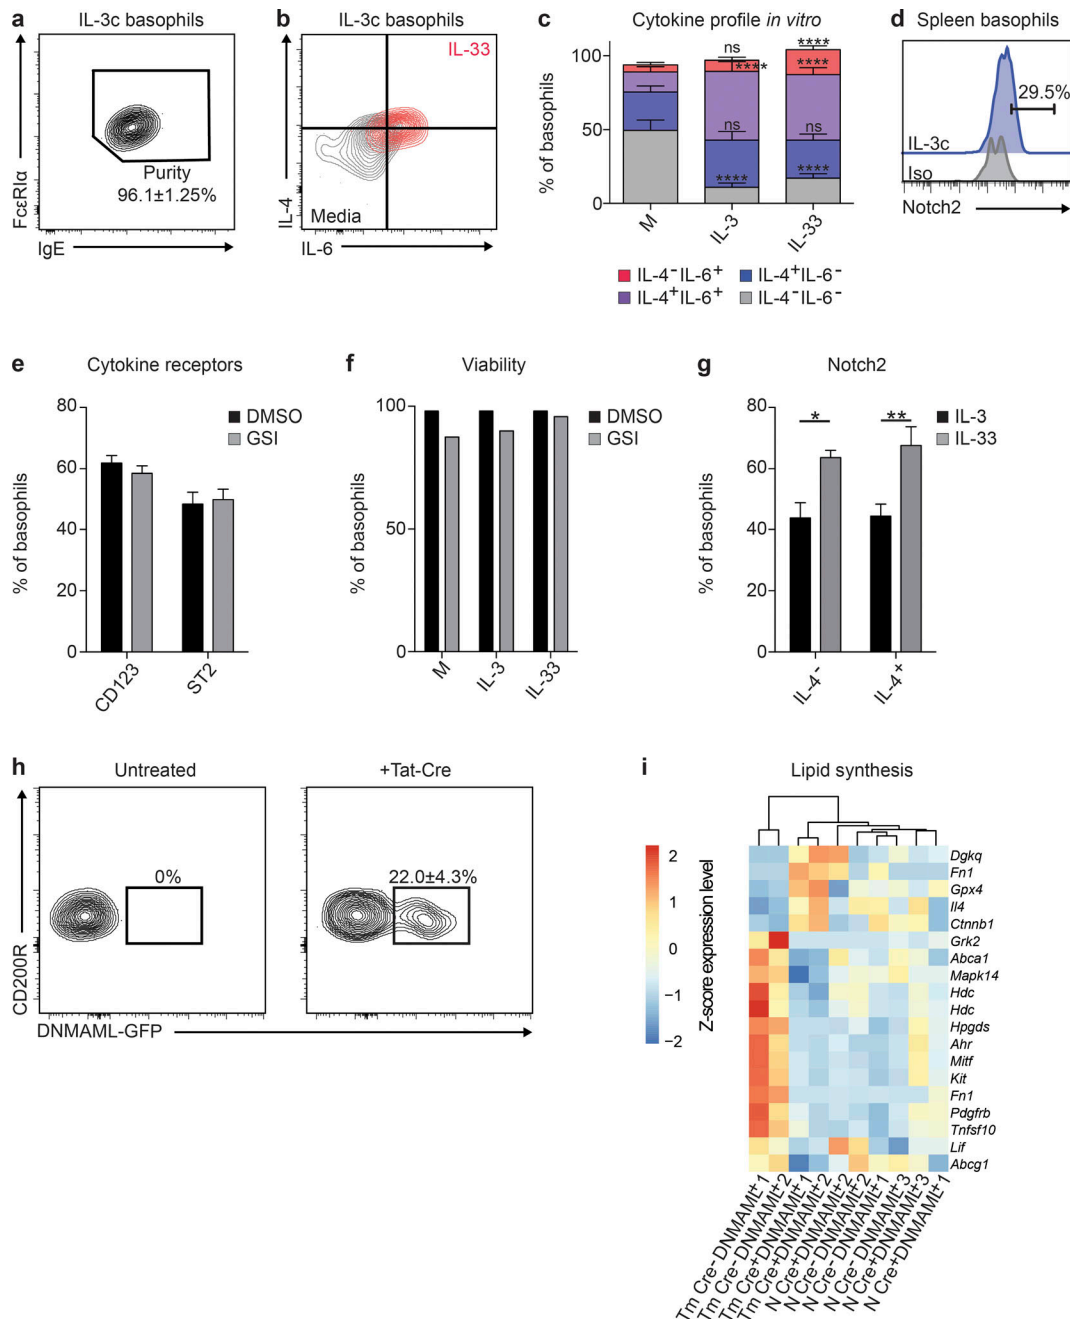

Figure S2. **Basophil in vitro cultures and RNaseq.** **(a)** Representative plot of splenic basophils sort-purified from IL-3c-treated mice. Mean ± SEM purity calculated as proportion of singlet, live CD45<sup>+</sup>Lin<sup>-</sup>IgE<sup>+</sup>FceRIα<sup>+</sup> in the lymphocyte gate (forward scatter area/side scatter area [FSC-A/SSC-A]). **(b)** Representative plot of IL-3c-elicited splenic basophil IL-4 and IL-6 intracellular staining. **(c)** Percentage of basophils staining positive for IL-4 and/or IL-6 following 18 h culture in media alone or with 10 ng/ml rmlIL-33 or rmlIL-3. **(d)** Representative histogram showing Notch2 staining on IL-3c-elicited splenic basophils (gray, isotype; blue, fully stained). **(e)** Percentage of IL-3c-elicited splenic basophils expressing CD123 or ST2 following 18-h culture in media alone or with 10 ng/ml rmlIL-33 or rmlIL-3. **(f)** Viability of IL-3c-elicited splenic basophils cultured in the presence or absence of 10 ng/ml IL-3 or IL-33 with DAPT (GSI) or a vehicle control (DMSO) for 3 d. **(g)** Percentage of IL-4<sup>-</sup> and IL-4<sup>+</sup> IL-3c-elicited splenic basophils expressing Notch2 following 18 h culture in media alone or with 10 ng/ml rmlIL-33 or rmlIL-3. **(h)** Representative plots of expression of DNAMML-GFP in Mcpt8Cre<sup>-</sup> DNAMML<sup>+</sup> basophils sort-purified from IL-3c-treated mice following 18 h in culture with media alone or Tat-Cre. **(i)** Heatmap showing expression of genes depicted as z-score associated with IPA-designated groups of genes associated with lipid synthesis in basophils from naive, IL-3-treated (N), and day 14 *T. muris*-infected, IL-3c-treated (Tm) Mcpt8Cre<sup>+</sup> DNAMML<sup>+</sup> and Mcpt8Cre<sup>-</sup> DNAMML<sup>+</sup> mice (genes filtered on differences between day 14 *T. muris*-infected Mcpt8Cre<sup>+</sup> DNAMML<sup>+</sup> and Mcpt8Cre<sup>-</sup> DNAMML<sup>+</sup> basophils (-log<sub>10</sub>(q value) > 1), samples arranged by hierarchical clustering). Mean ± SEM; \*, P < 0.05; \*\*, P < 0.01; \*\*\*\*, P < 0.0001; analyzed by using (c and g) a linear fixed-effect model with pairwise comparison; (a) representative of all sorting experiments depicted; (b) representative of five experiments; (c) five experiments pooled (fifteen to sixteen wells/condition total); (d) representative of three experiments; (e) three experiments pooled (five wells/condition total); (f) representative of two experiments (one well/condition shown); (g) three experiments pooled (IL-3, n = 14; IL-33, n = 12); (h) representative of two experiments; and (i) samples included cells from three to four pooled mice.

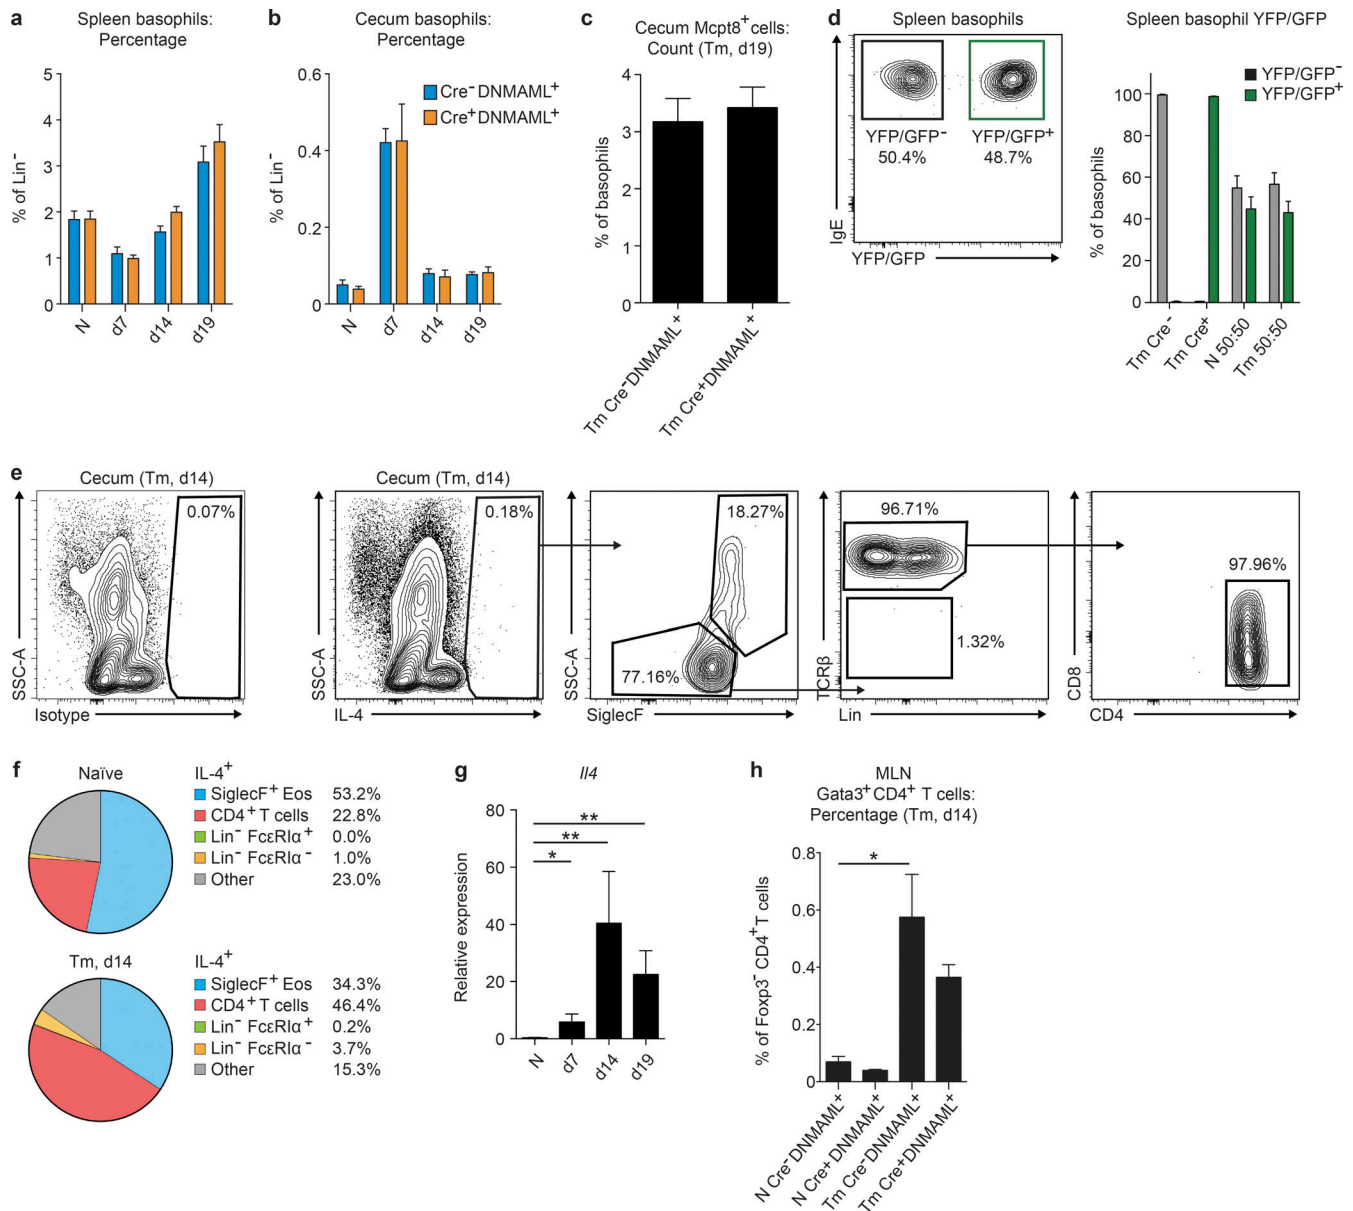

Figure S3. Immune activation in the MLN, spleen, and cecum of *T. muris*-infected mice lacking Notch signaling in basophils. (a and b) Spleen (a) and cecum (b) basophil percentage of Lin<sup>-</sup> cells in naive (N) and *T. muris*-infected (Tm) Mcpt8Cre<sup>-</sup> DNAMAML<sup>+</sup> and Mcpt8Cre<sup>+</sup> DNAMAML<sup>+</sup> mice on day (d) 7, 14, and 19 p.i. (c) Average number of Mcpt8<sup>+</sup> basophils per high-powered field from Mcpt8Cre<sup>-</sup> DNAMAML<sup>+</sup> and Mcpt8Cre<sup>+</sup> DNAMAML<sup>+</sup> mice day 19 after *T. muris* infection quantified from immunofluorescent staining. (d) Distribution of Mcpt8Cre<sup>-</sup> DNAMAML<sup>+</sup> and Mcpt8Cre<sup>+</sup> DNAMAML<sup>+</sup> basophils in 50:50 and single genotype transfer chimeric mice that were N or on day 19 p.i. with *T. muris* in the spleen. (e and f) Representative gating (e) and quantification (f) of IL-4-expressing cell types in the cecum of N or day 14 *T. muris*-infected C57BL/6 mice following 5 h incubation with Brefeldin A. (g) *Il4* gene expression (relative to *Actb* and normalized to N) measured by real-time PCR in colon homogenates in N and *T. muris*-infected C57BL/6 mice on day 7, 14, and 19 p.i. (h) Percentage of TCRβ<sup>+</sup>CD4<sup>+</sup>CD8<sup>-</sup>Foxp3<sup>-</sup> cells that expressed Gata3 in the MLN in N or day 14 *T. muris*-infected Mcpt8Cre<sup>-</sup> DNAMAML<sup>+</sup> and Mcpt8Cre<sup>+</sup> DNAMAML<sup>+</sup> mice. Mean ± SEM; \*, P < 0.05; \*\*, P < 0.01; analyzed (g and h) using a linear fixed-effect model with pairwise comparison; (a, b, and g) three experiments pooled (N, n = 6; Tm, n = 5–7/time point); (c) two experiments pooled (n = 8); (d) representative of two experiments (Tm single transfer controls, n = 2–3; 50:50 N, n = 4; 50:50 Tm, n = 7); (e) representative of two experiments; (f) two experiments pooled (N, n = 4; Tm, n = 7); and (h) three experiments pooled (N, Tm n = 6).

Table S1 is provided online as a separate Excel file, and lists gene information for all differentially expressed genes (with q value <0.1, β value >|1.5|) between Mcpt8Cre<sup>-</sup> DNAMAML<sup>+</sup> and Mcpt8Cre<sup>+</sup> DNAMAML<sup>+</sup> basophils from mice on day 14 of *T. muris* infection following IL-3c treatment.
